# Supplementary material for: Fluorescent organic ion pairs based on berberine: counter-ion effect on the formation of particles and on the uptake by colon cancer cells
Source: Royal Society of Chemistry journal article supplement (doi:10.1039/c4ra09993a), 2014-12-02
Supplement: c4ra09993a1.pdf [file c4ra09993a1.pdf]

## Supporting information

### Fluorescent organic ion pairs based on berberine: Counter-ion effect on the formation of particles and on the uptake by colon cancer cells

*Marine Soulié, Céline Frongia, Valérie Lobjois and Suzanne Fery-Forgues*

| Ber <sup>+</sup> R <sup>-</sup>   | $\lambda_{em}$ (nm) | $\phi_P$ (solid) |
|-----------------------------------|---------------------|------------------|
| Ber <sup>+</sup> Pal <sup>-</sup> | 530                 | 0.044            |
| Ber <sup>+</sup> AOT <sup>-</sup> | 546                 | 0.052            |
| Ber <sup>+</sup> Tos <sup>-</sup> | 512                 | 0.031            |
| Ber <sup>+</sup> TPB <sup>-</sup> | 552                 | 0.006            |

**Table S1.** Maximum emission wavelength ( $\lambda_{em}$ ) and photoluminescence quantum yields ( $\phi_P$ ) of the four organic salts of berberine investigated in this work. Excitation at 420 nm.

| Volume of Ber <sup>+</sup> Cl <sup>-</sup> solution (μL) | Concentration of Ber <sup>+</sup> Cl <sup>-</sup> solution (mM) | Volume of Na <sup>+</sup> X <sup>-</sup> (μL) | Concentration of Na <sup>+</sup> X <sup>-</sup> (mM) | Final concentration of Ber <sup>+</sup> X <sup>-</sup> (μM) |
|----------------------------------------------------------|-----------------------------------------------------------------|-----------------------------------------------|------------------------------------------------------|-------------------------------------------------------------|
| 500                                                      | 1                                                               | 500                                           | 1                                                    | 500                                                         |
| 750                                                      | 0.333                                                           | 250                                           | 1                                                    | 250                                                         |
| 975                                                      | 0.0256                                                          | 25                                            | 1                                                    | 25                                                          |

**Table S2.** Volumes and concentrations of solutions used to prepare Ber<sup>+</sup>X<sup>-</sup> salts using Protocol 1.

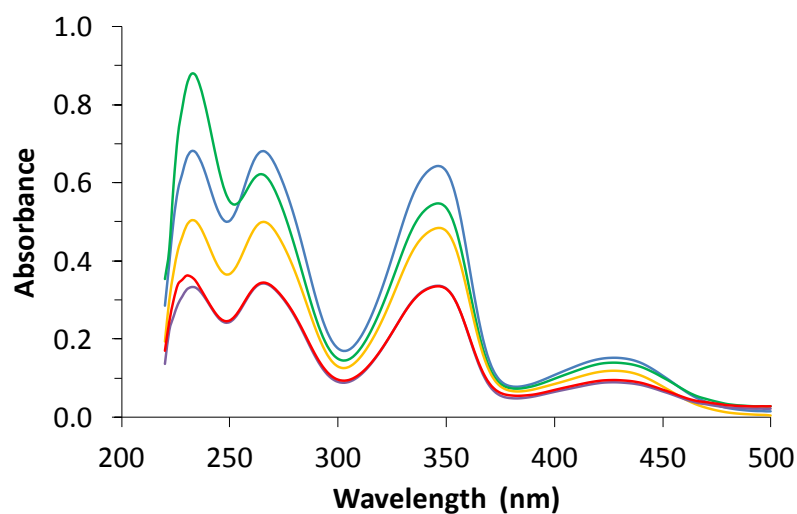

**Figure S1.** UV-vis absorption spectra of the berberine salts dissolved in acetonitrile.  $\text{Ber}^+\text{Pal}^-$ , orange line;  $\text{Ber}^+\text{AOT}^-$ , purple line;  $\text{Ber}^+\text{Tos}^-$ , red line;  $\text{Ber}^+\text{TPB}^-$  green line,  $\text{Ber}^+\text{Cl}^-$ , blue line. Salt concentration in the  $10^{-5}$  M range. The deformation of the  $\text{Ber}^+\text{TPB}^-$  spectrum at low wavelengths can be attributed to absorption of  $\text{TPB}^-$  anion.

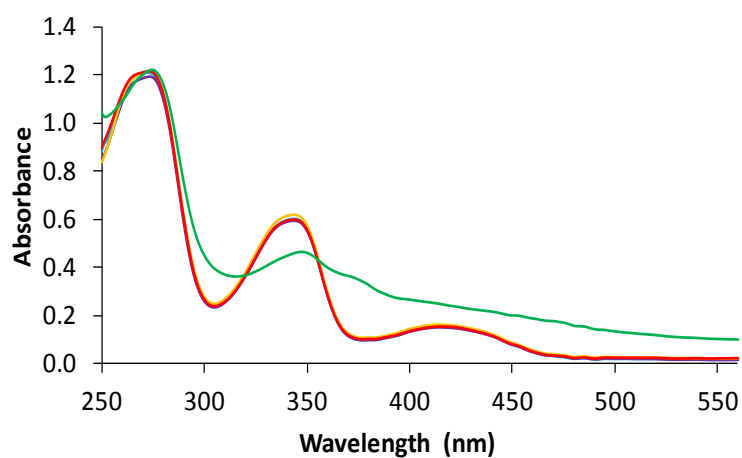

**Figure S2.** UV-vis absorption spectra of the berberine salts prepared in Opti-MEM according to Protocol 1.  $\text{Ber}^+\text{Pal}^-$ , orange line;  $\text{Ber}^+\text{AOT}^-$ , purple line;  $\text{Ber}^+\text{Tos}^-$ , red line;  $\text{Ber}^+\text{TPB}^-$  green line,  $\text{Ber}^+\text{Cl}^-$ , blue line. Salt concentration: 25  $\mu\text{M}$ .

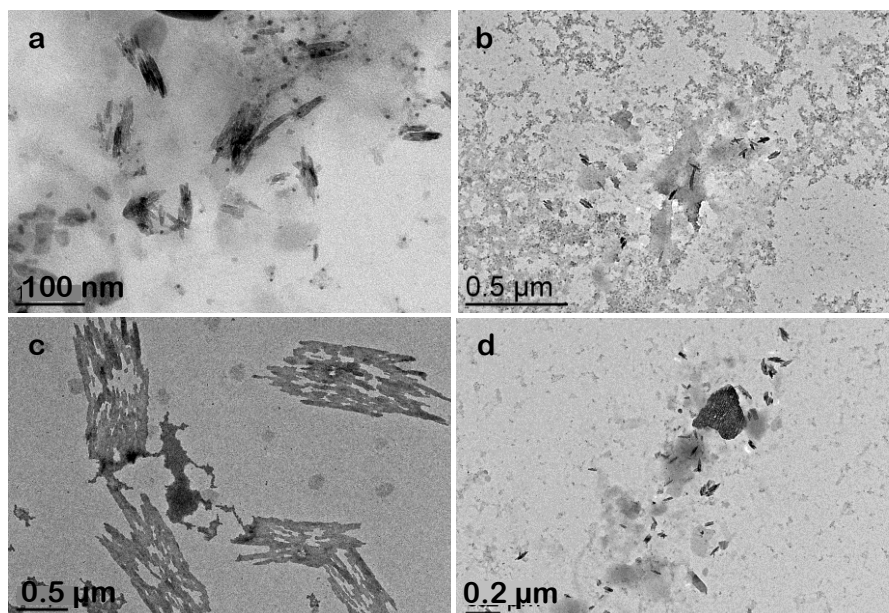

**Figure S3.** Transmission electron microscopy images of berberine salts in water at 50  $\mu\text{M}$ . a)  $\text{Ber}^+\text{Tos}^-$ , b)  $\text{Ber}^+\text{Pal}^-$ , and c)  $\text{Ber}^+\text{AOT}^-$  prepared according to Protocol 1. d)  $\text{Ber}^+\text{TPB}^-$  prepared according to Protocol 2.

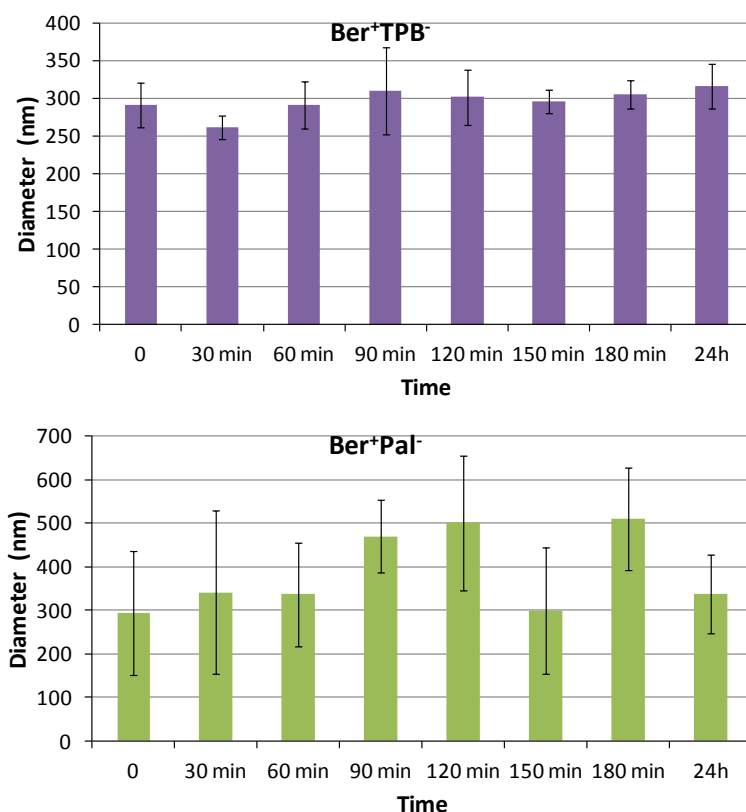

**Figure S4.** Evolution over time of the hydrodynamic diameter (in intensity) measured by DLS. NPs of  $\text{Ber}^+\text{TPB}^-$  and  $\text{Ber}^+\text{Pal}^-$  in water were prepared using Protocol 1 and incubated at 25°C. Salt concentration: 50  $\mu\text{M}$ .

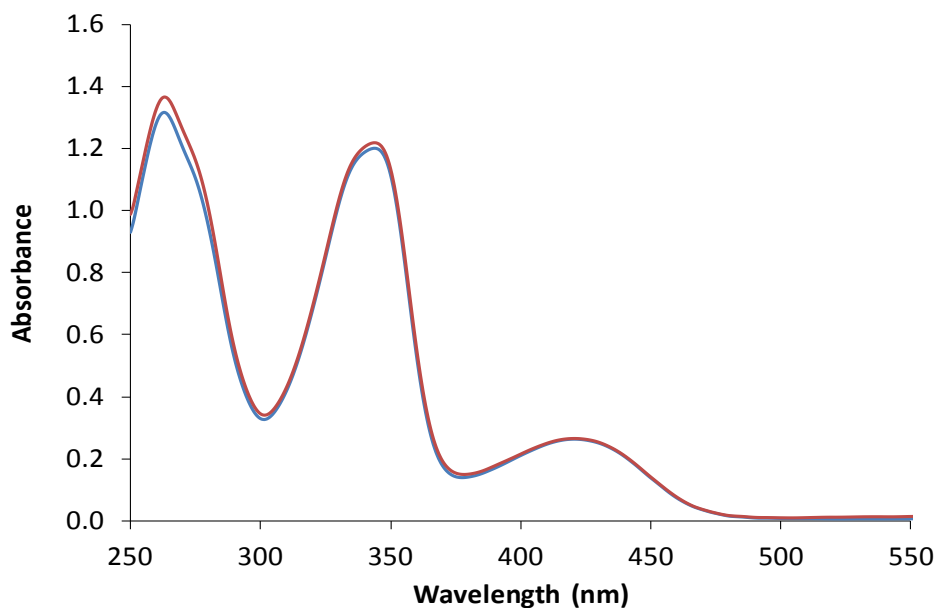

**Figure S5.** UV-vis absorption spectra of  $\text{Ber}^+\text{Cl}^-$  in water (blue line) and in Opti-MEM (red line) at  $50\ \mu\text{M}$ . Each spectrum is the average of 5 independent measurements.

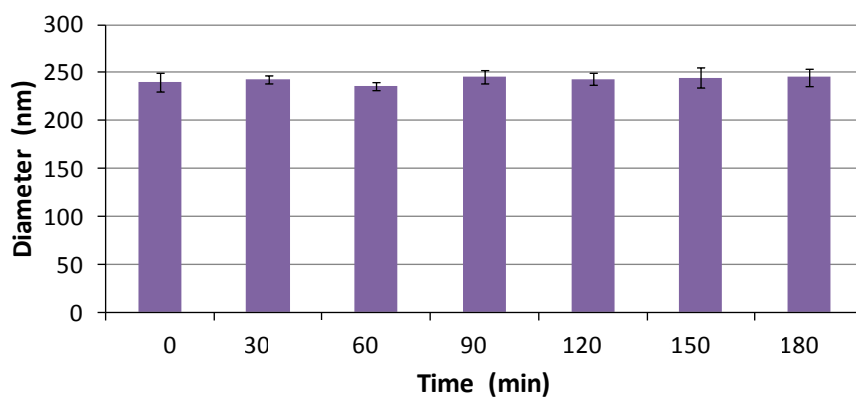

**Figure S6.** Evolution over time of the hydrodynamic diameter (in intensity) measured by DLS. NPs of  $\text{Ber}^+\text{TPB}^-$  in Opti-MEM containing 5% fetal calf serum were prepared using Protocol 1 and incubated at  $37^\circ\text{C}$ . Salt concentration:  $50\ \mu\text{M}$ .

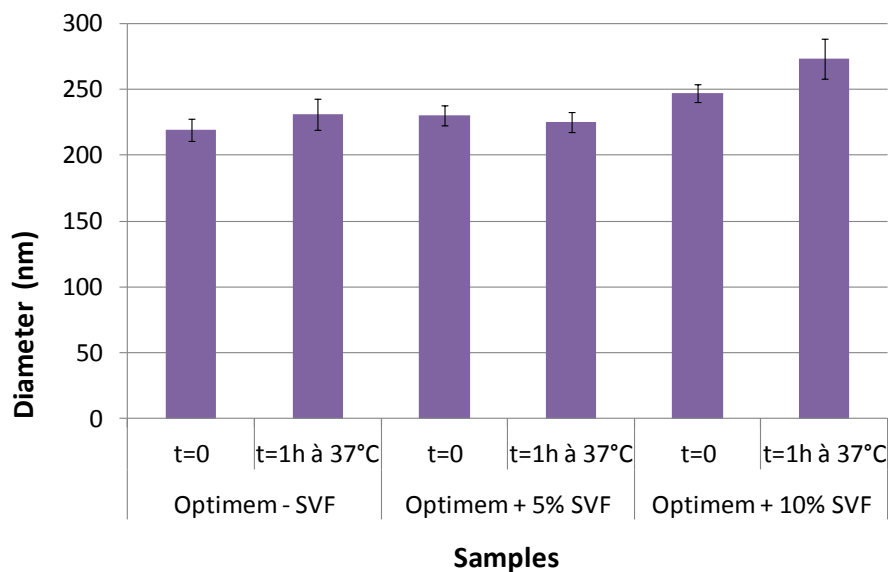

**Figure S7.** Hydrodynamic diameter (in intensity) measured by DLS of  $\text{Ber}^+\text{TPB}^-$  nanoparticles in Opti-MEM containing 0%, 5% and 10% fetal calf serum, one measurement immediately after dilution ( $t = 0$ ), and after 1h incubation at  $37^\circ\text{C}$  ( $t = 1\text{h}$ ). NPs were prepared using Protocol 1, salt concentration:  $50\ \mu\text{M}$ .

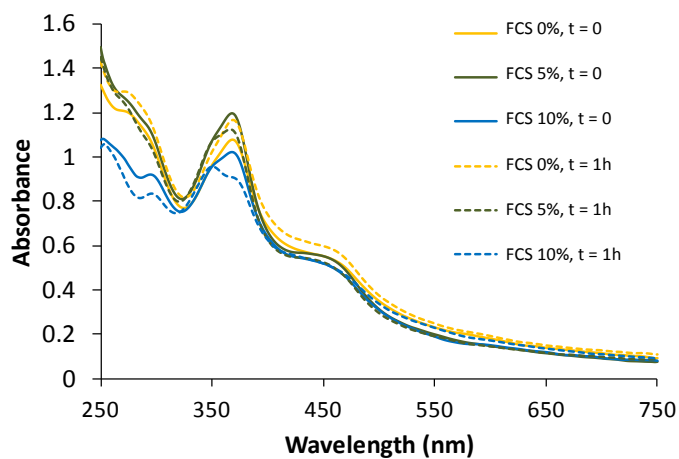

**Figure S8.** UV-vis absorption spectra of  $\text{Ber}^+\text{TPB}^-$  in Opti-MEM containing 0%, 5% and 10% fetal calf serum. Samples were prepared using Protocol 1 and absorbance was measured immediately after dilution (solid lines) and after 1h incubation at  $37^\circ\text{C}$  (dashed lines). Salt concentration:  $50\ \mu\text{M}$ .

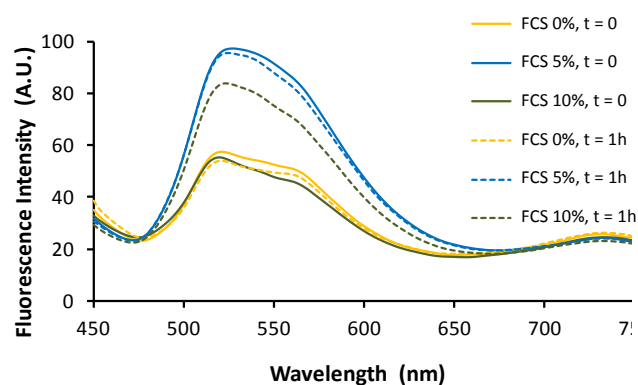

**Figure S9.** Fluorescence spectra of  $\text{Ber}^+\text{TPB}^-$  in Opti-MEM containing 0% (yellow line), 5% (green line) and 10% (blue line) fetal calf serum. Samples were prepared using Protocol 1 and fluorescence was measured immediately after dilution (solid lines), and after 1h incubation at 37 °C (dashed lines). Salt concentration: 50  $\mu\text{M}$ .  $\lambda_{\text{ex}} = 420 \text{ nm}$ .

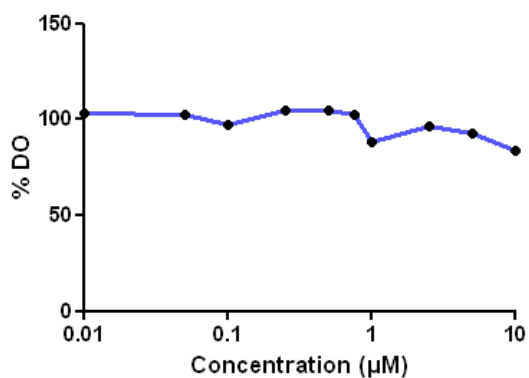

**Figure S10.** Absorbance of HCT-116 cells incubated with various concentrations of  $\text{Ber}^+\text{Pal}^-$  after reaction with reagent WST-1. Absorbance measured at 450 nm.

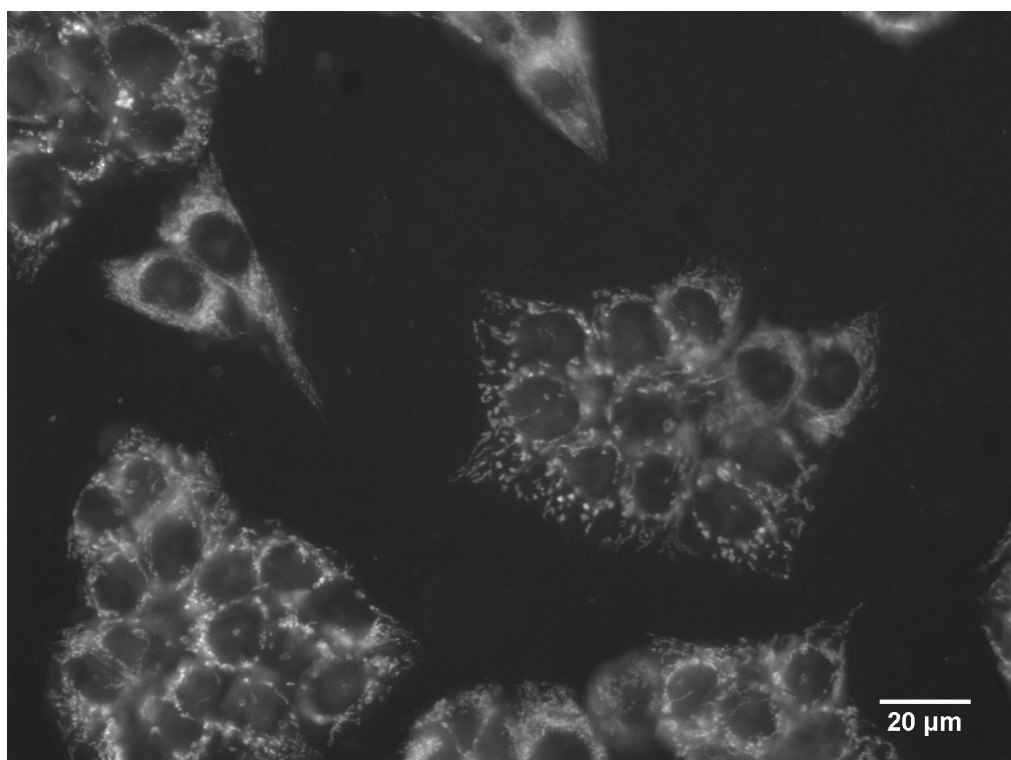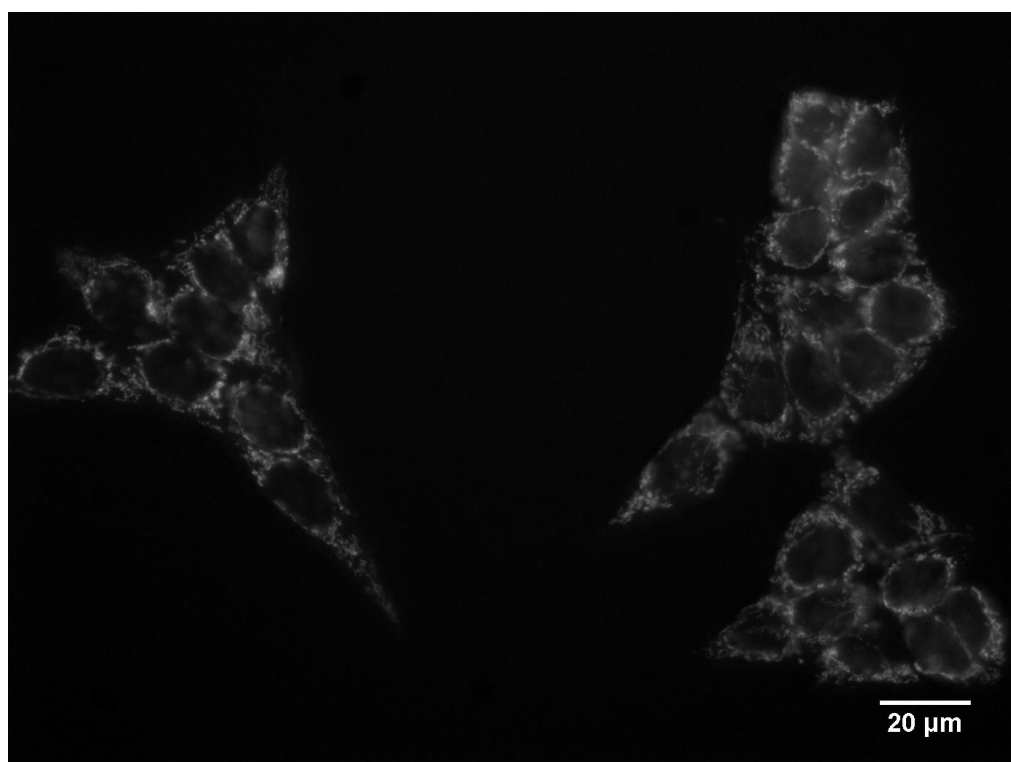

**Figure S11.** Microscopy images of HCT 116 wt cells incubated during 1h at 37 °C in the presence of  $\text{Ber}^+\text{TPB}^-$  at 50  $\mu\text{M}$ .  $\lambda_{\text{ex}} = 470 \text{ nm}$ .

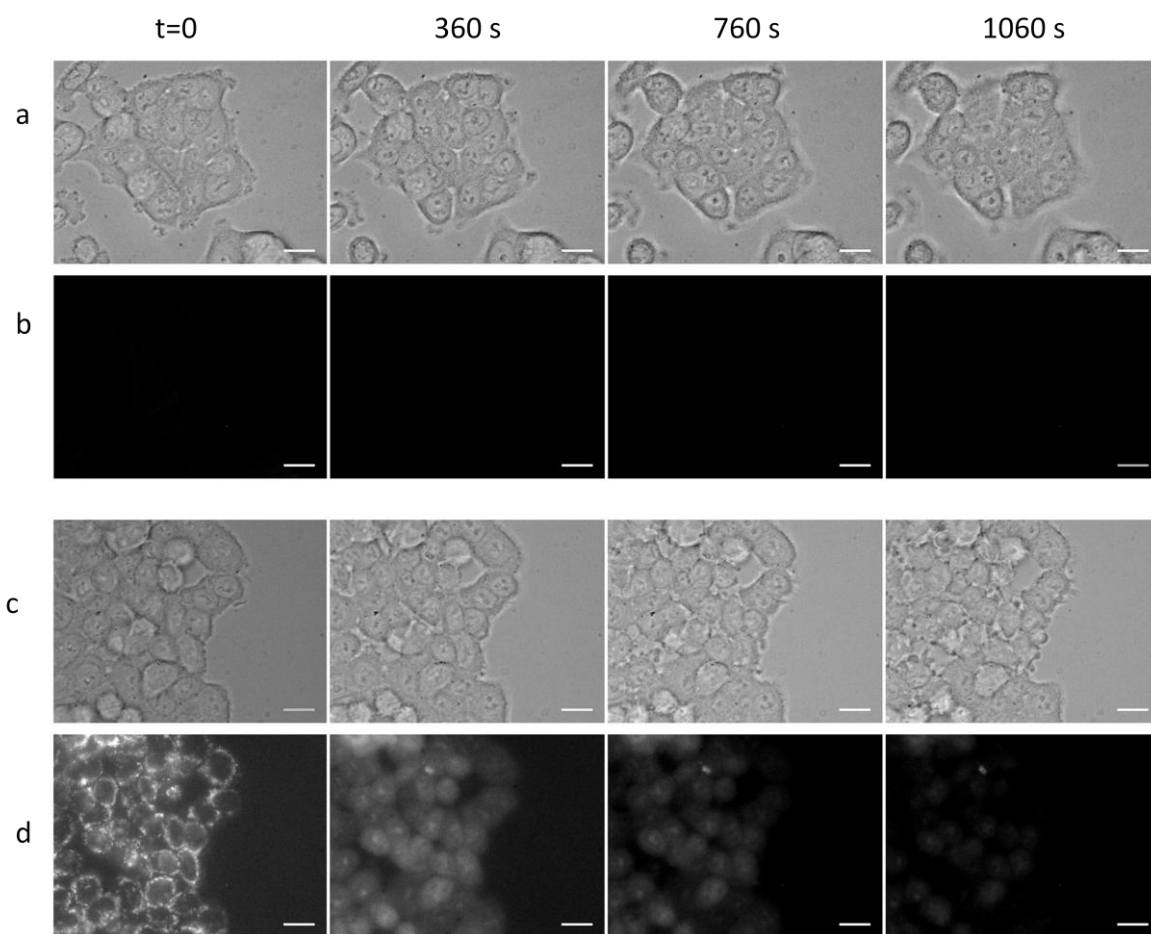

**Figure S12.** Videomicroscopy images of HCT-116 cells incubated at 37°C for 1h without berberine salt (a, b) and with Ber<sup>+</sup>TPB<sup>-</sup> (c, d) at the concentration of 50 μM in Opti-MEM, and then washed with Opti-MEM, recorded in transmitted light (a, c) and fluorescence light (b, d). One image was taken every 40 s but only selected images are shown here.  $\lambda_{\text{ex}} = 470 \text{ nm}$  and  $\lambda_{\text{em}} = 525 \text{ nm}$ . Scale bar: 25 μm.
